# Supplementary material
Source: publisher site journal article supplement (https://www.dovepress.com/article/409615)
Supplement: Supplementary file 1 [file get_supplementary_file.php]

Supplement 1: ORs and 95%CIs of all confounders on COVID-19 severity in all patients. (scores of MNA-SF in the model)

| **characteristics** | **OR (odds ratio)** | **95%CI (confidence interval)** |
| --- | --- | --- |
| age | 0.99 | 0.97, 1.02 |
| Sex (0=female, 1=male) | 0.67 | 0.35, 1.25 |
| Vaccination (0=no, 1=1,2,or 3 doses) | 0.48 | 0.23, 0.95 |
| MNA-SF | 0.83 | 0.72, 0.94 |

Supplement 2: ORs and 95%CIs of all confounders on COVID-19 severityin all patients. (binary index of MNA-SF in the model)

| **characteristics** | **OR (odds ratio)** | **95%CI (confidence interval)** |
| --- | --- | --- |
| age | 1.00 | 0.98, 1.02 |
| Sex (0=female, 1=male) | 0.75 | 0.40, 1.39 |
| Vaccination (0=no, 1=1,2,or 3 doses) | 0.43 | 0.21, 0.85 |
| MNA-SF (0: ≤11, 1: >11) | 0.55 | 0.29, 1.03 |

Supplement 3: ORs and 95%CIs of all confounders on COVID-19 severity in non-vaccinated and vaccinated groups. (scores of MNA-SF in the model)

| **group** | **characteristics** | **OR (odds ratio)** | **95%CI (confidence interval)** |
| --- | --- | --- | --- |
| No vaccination group | age | 0.99 | 0.97, 1.02 |
| Sex (0=female, 1=male) | 0.75 | 0.32, 1.77 |
| MNA-SF | 0.80 | 0.68, 0.93 |
| Vaccination group | age | 1.00 | 0.96, 1.03 |
| Sex (0=female, 1=male) | 0.50 | 0.18, 1.33 |
| MNA-SF | 1.06 | 0.79, 1.42 |

Supplement 4: ORs and 95%CIs of all confounders on COVID-19 severity in non-vaccinated and vaccinated groups. (binary index of MNA-SF in the model)

| **group** | **characteristics** | **OR (odds ratio)** | **95%CI (confidence interval)** |
| --- | --- | --- | --- |
| No vaccination group | age | 1.00 | 0.97, 1.03 |
| Sex (0=female, 1=male) | 0.89 | 0.38, 2.05 |
| MNASF (0:≤11, 1:>11) | 0.39 | 0.17, 0.88 |
| Vaccination group | age | 1.00 | 0.96, 1.03 |
| Sex (0=female, 1=male) | 0.50 | 0.18, 1.32 |
| MNA-SF (0:≤11, 1:>11) | 1.09 | 0.39, 3.03 |

Supplement 5: HRs and 95%CIs of all confounders on negative conversion time of PCR in all patients. (scores of MNA-SF in the model)

| **characteristics** | **HR (hazard ratio)** | **95%CI (confidence interval)** |
| --- | --- | --- |
| age | 0.99 | 0.98, 1.01 |
| Sex (0=female, 1=male) | 1.16 | 0.82, 1.63 |
| Vaccination (0=no, 1=1, 2, or 3 doses) | 1.34 | 0.93, 1.93 |
| MNA-SF | 1.11 | 1.03, 1.20 |

Supplement 6: HRs and 95%CIs of all confounders on negative conversion time of PCR in all patients. (binary index of MNA-SF in the model)

| **characteristics** | **HR (hazard ratio)** | **95%CI (confidence interval)** |
| --- | --- | --- |
| age | 0.99 | 0.98, 1.01 |
| Sex (0=female, 1=male) | 1.09 | 0.77, 1.53 |
| Vaccination (0=no, 1=1, 2, or 3 doses) | 1.41 | 0.98, 2.02 |
| MNA-SF (0:≤11, 1:>11) | 1.46 | 1.03, 2.06 |

Supplement 7: HRs and 95%CIs of all confounders on negative conversion time of PCR in non-vaccinated and vaccinated groups. (scores of MNA-SF in the model)

| **group** | **characteristics** | **HR (hazard ratio)** | **95%CI (confidence interval)** |
| --- | --- | --- | --- |
| No vaccination group | age | 1.00 | 0.98, 1.02 |
| Sex (0=female, 1=male) | 1.05 | 0.64, 1.72 |
| MNA-SF | 1.09 | 1.00, 1.18 |
| Vaccination group | Age | 0.99 | 0.97, 1.01 |
| Sex (0=female, 1=male) | 1.30 | 0.78, 2.16 |
| MNA-SF | 1.18 | 0.99, 1.40 |

Supplement 8: HRs and 95%CIs of all confounders on negative conversion time of PCR in non-vaccinated and vaccinated groups. (binary index of MNA-SF in the model)

| **group** | **characteristics** | **HR (hazard ratio)** | **95%CI (confidence interval)** |
| --- | --- | --- | --- |
| No vaccination group | age | 1.00 | 0.98, 1.02 |
| Sex (0=female, 1=male) | 0.99 | 0.60, 1.62 |
| MNASF (0:≤11, 1:>11) | 1.44 | 0.91, 2.28 |
| Vaccination group | age | 0.98 | 0.96, 1.00 |
| Sex (0=female, 1=male) | 1.28 | 0.77, 2.13 |
| MNASF (0:≤11, 1:>11) | 1.35 | 0.79, 2.30 |
